# Supplementary material
Source: PubMed Central journal article supplement (PMC3721354)
Supplement: NIHMS489248-supplement-Suppl_Fig_1.pdf [file NIHMS489248-supplement-Suppl_Fig_1.pdf]

## Supplementary Figure 1A

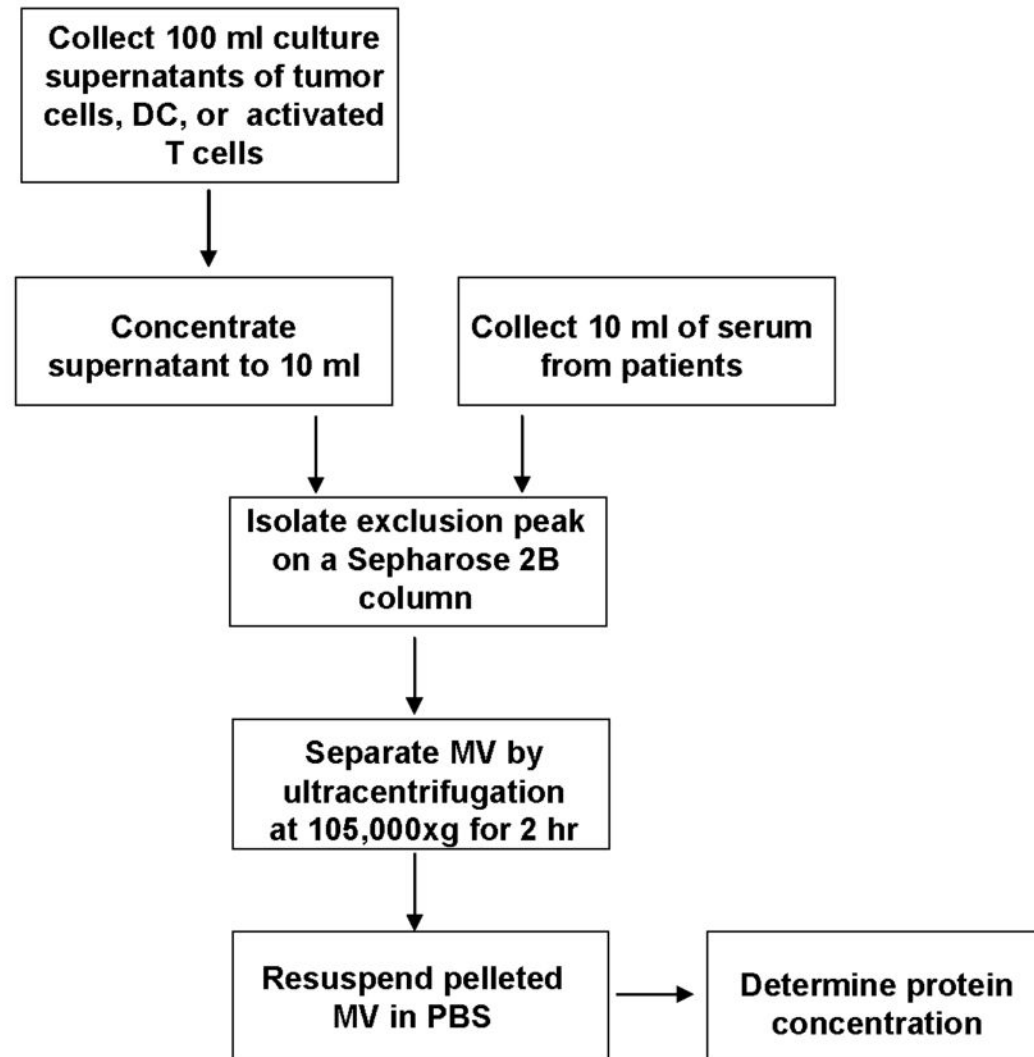

A schema of MV purification from culture supernatants and sera.

## Supplementary Figure 1B

**Serum-derived MV**

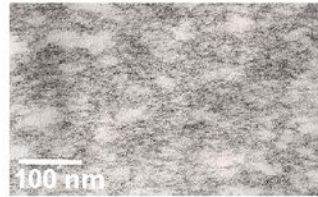

**NC**

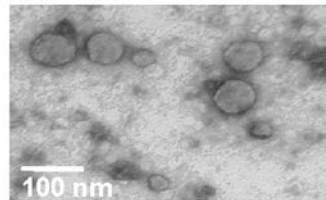

**HNC**

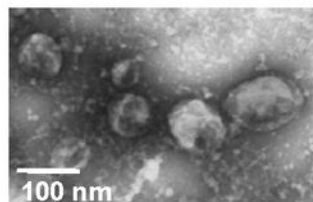

**melanoma**

**Culture-derived MV**

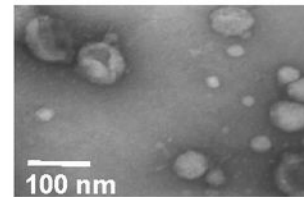

**DC**

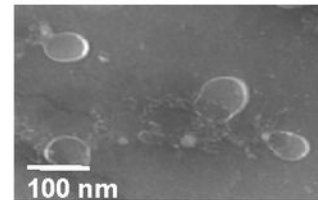

**PCI-13**

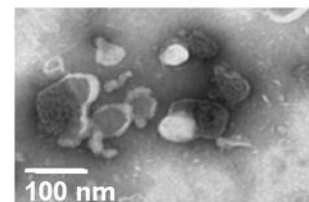

**SW-melanoma**

An electron micrograph of culture- and serum-derived MV. All MV preparations were analyzed by transmission EM. Representative micrographs are shown.
